# Supplementary material
Source: PubMed Central journal article supplement (PMC4595851)
Supplement: NIHMS724736-supplement-Supplemental.pdf [file NIHMS724736-supplement-Supplemental.pdf]

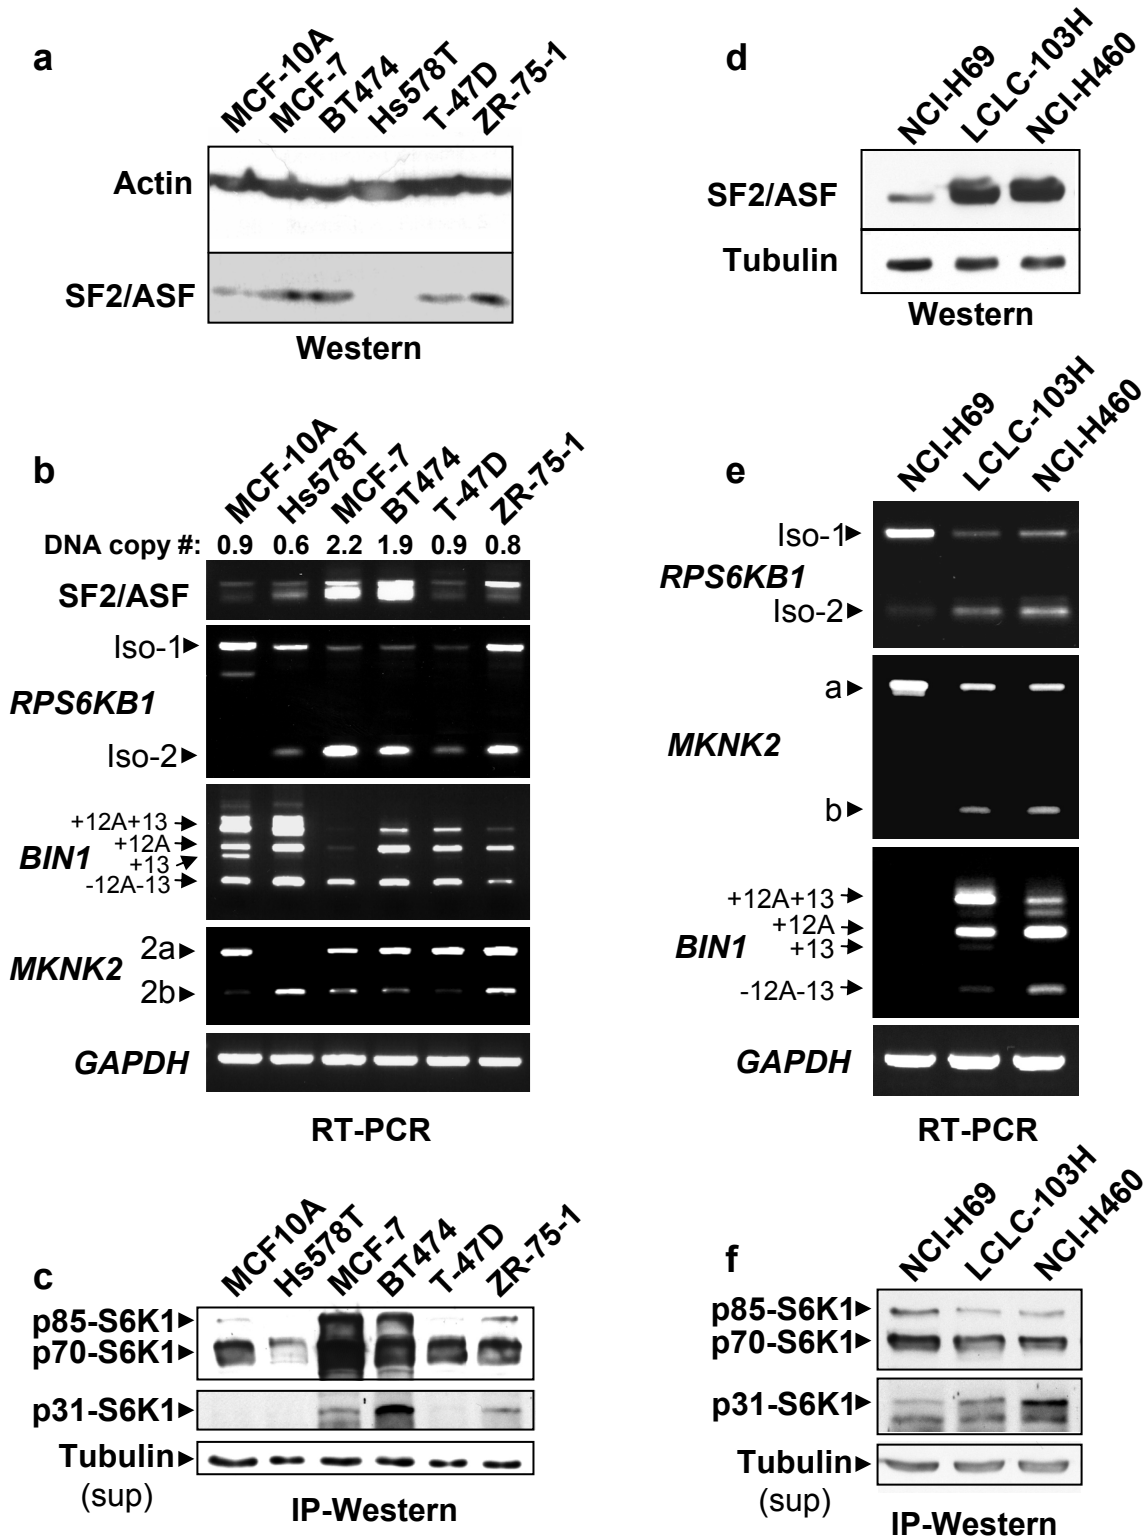

**Supplementary Figure 1.** Amplification and overexpression of SF2/ASF in cancer cell lines, and correlation with alternative splicing of its targets. (a) Western blot analysis of SF2/ASF levels in lysates of an immortal breast cell line (MCF10A) or five breast-cancer cell lines. (b) The mRNA levels of SF2/ASF, *GAPDH*, and the isoforms of *RPS6KB1*, *MKNK2*, and *BIN1* were detected by RT-PCR as in Fig. 4, in RNA samples from the indicated breast cell lines. MCF7, BT474, and ZR751 are known to have 17q23 amplification<sup>8</sup>. The DNA copy number of *SFRS1* (SF2/ASF) (measured by TaqMan and normalized to  $\beta$ -actin) is shown above the RT-PCR panel. (c) IP-Western analysis of S6K1 isoforms in the breast cell lines, carried out as in Fig. 7e. (d) Western blot analysis of SF2/ASF levels in three lung-cancer cell lines. (e) The levels of *GAPDH*, and the isoforms of *RPS6KB1*, *MKNK2*, and *BIN1* in the lung-cancer cell lines were detected by RT-PCR. (f) IP-Western analysis of S6K1 isoforms in the lung-cancer cell lines.

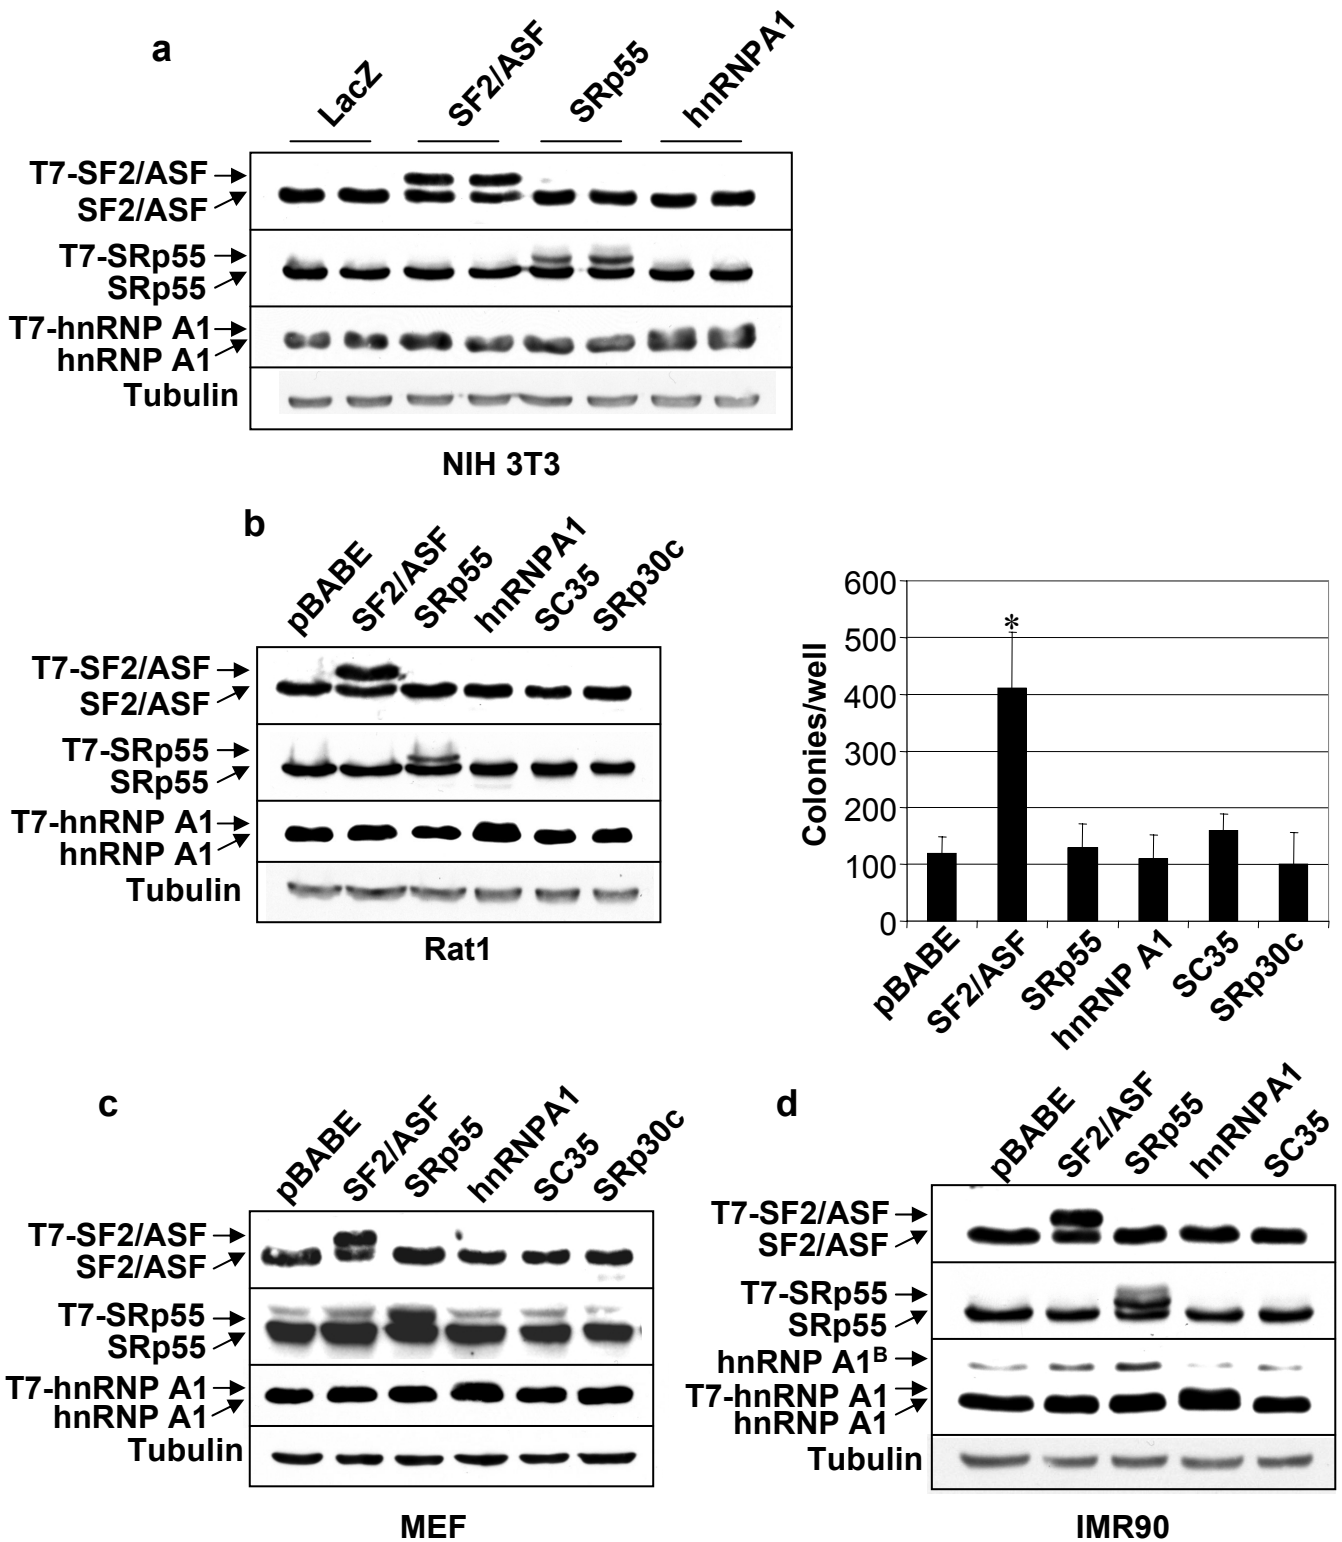

**Supplementary Figure 2.** Analysis of transduced splicing factor levels in mouse, rat, and human cell lines. Stable cell lines were selected after infection with the indicated retroviruses. Cells were lysed in SDS, and Western blots were carried out using monoclonal antibodies to SF2/ASF, SRp55, hnRNP A1, and tubulin. The T7-tagged proteins migrate slightly above the endogenous ones. Ectopic expression of SF2/ASF reproducibly results in slight downregulation of endogenous SF2/ASF. **(a)** NIH 3T3 immortal mouse fibroblasts. **(b)** Rat1 immortal rat fibroblasts. Soft-agar colonies were counted as in **Fig. 2b**. Means  $\pm$  s.d. are shown. \*  $P < 5.6E-7$  **(c)** Mouse embryonic fibroblasts. **(d)** Human primary lung fibroblasts. hnRNP A1<sup>B</sup> is an alternatively spliced isoform of hnRNP A1

**a**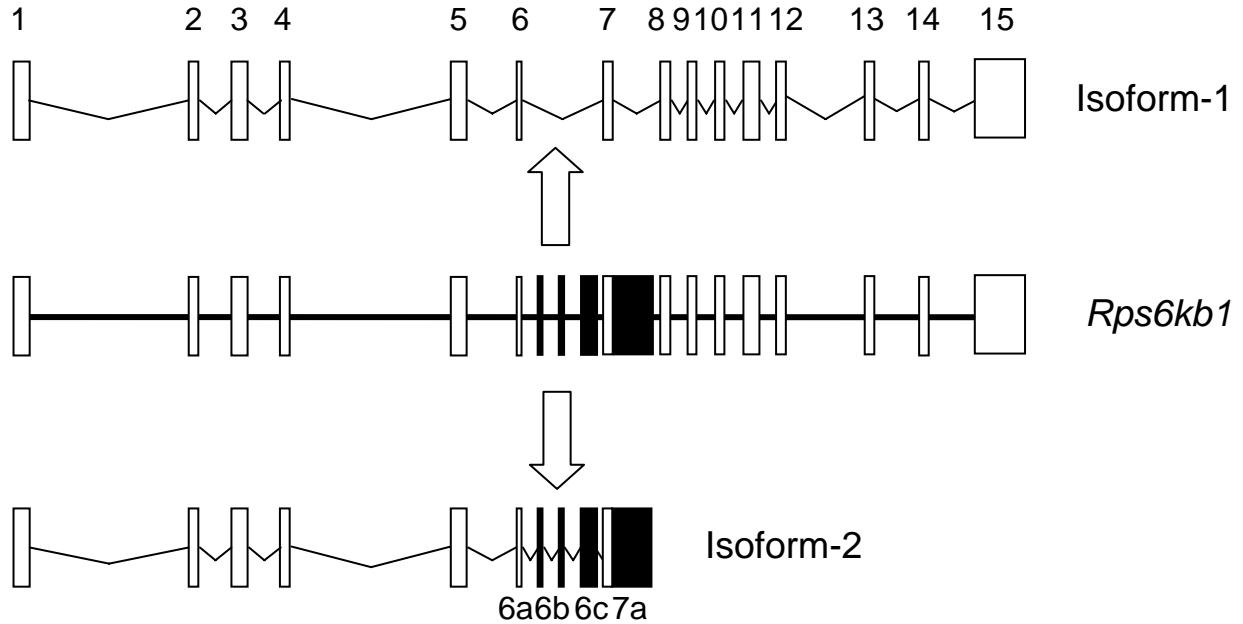**b**

|                                                                                                                                                      |                                                                      |                                            |     |
|------------------------------------------------------------------------------------------------------------------------------------------------------|----------------------------------------------------------------------|--------------------------------------------|-----|
| 1-                                                                                                                                                   | MRRRRRRDGFYLAPDFRHREAED                                              | MAGVFDIDLDQPEDAGSEDELEEGGQLNESMDHGGVGPYELG | 65  |
| 2-                                                                                                                                                   | MRRRRRRDGFYLAPDFRHREAED                                              | MAGVFDIDLDQPEDAGSEDELEEGGQLNESMDHGGVGPYELG | 65  |
| <div style="display: flex; justify-content: space-around; width: 100%;"> <span>I</span> <span>II</span> </div>                                       |                                                                      |                                            |     |
| 1-                                                                                                                                                   | MEHCEKFEISETSVNRGPEKIRPECFELLRVLGKGGYGK                              | VFQVRKVTGANTGKIFAMKVLKKAMI                 | 130 |
| 2-                                                                                                                                                   | MEHCEKFEISETSVNRGPEKIRPECFELLRVLGKGGYGK                              | VFQVRKVTGANTGKIFAMKVLKKAMI                 | 130 |
| <div style="display: flex; justify-content: space-around; width: 100%;"> <span>III</span> <span>IV</span> <span>V</span> </div>                      |                                                                      |                                            |     |
| 1-                                                                                                                                                   | VRNAKDTAHTKAERNILEEVKHPFIVDLIYAFQTGGKLYLILEYLS                       | GGELEFMQLEREGIFMEDTA                       | 195 |
| 2-                                                                                                                                                   | VRNAKDTAHTKAERNILEEVKHPFIVDLIYAFQTGGKLYLILEYLS                       | GGELEFMQLEREGIFMEDTA                       | 195 |
| <div style="display: flex; justify-content: space-around; width: 100%;"> <span>VIA</span> <span>VIB</span> <span>VII</span> <span>VIII</span> </div> |                                                                      |                                            |     |
| 1-                                                                                                                                                   | CFYLAEISMA LGHLHQKGI IYRDLKPENIMLNHQ                                 | GHVKLTDFGLCKESIHDGTVTHTFCGTIEYM            | 260 |
| 2-                                                                                                                                                   | WPWVDRSSLQNFLELTFQFPRCSLREVITLNIHLWIDFIARMSALLFAFSNTEAAFKSLRDEVP     |                                            | 260 |
| <div style="display: flex; justify-content: space-around; width: 100%;"> <span>IX</span> <span>X</span> </div>                                       |                                                                      |                                            |     |
| 1-                                                                                                                                                   | APEILMRSGHNRAVDWWSL GALMYDMLTGAPPFTGENRKKTTIDKILKCKLNLPPYL TQEARDLLK |                                            | 325 |
| 2-                                                                                                                                                   | LFGGGSLS PVEAVVLLAVKLPQSSRTHPPSWSNLQDCNIVTQPVLQCFVLFESRQG            |                                            | 316 |
| <div style="display: flex; justify-content: space-around; width: 100%;"> <span>XI</span> </div>                                                      |                                                                      |                                            |     |
| 1-                                                                                                                                                   | KLLKRNAASRLGAGPGDAGEVQAHPFFRHINWEELLARKVEPPFKPLLQSEEDV SQFDSKFTRQT   |                                            | 390 |
| 1-                                                                                                                                                   | PVDSPDDSTLSESANQVFLGFTYVAPSVLESVKEKFSFEPKIRSPRRFIGSPRTPVSPVKFSPGD    |                                            | 455 |
| 1-                                                                                                                                                   | FWGRGASASTANPQTPEYPMETSGIEQMDVTVSGEASAPLPIRQPNSGPYKKQAFPMISKRPEH     |                                            | 520 |
| 1-                                                                                                                                                   | LRMNL                                                                |                                            | 525 |

**Supplementary Fig. 3** Alternative splicing of mouse *Rps6kb1* and primary structure of the two S6K1 isoforms. (a) The mouse *Rps6kb1* gene (middle) is alternatively spliced to generate two

isoforms: a long, 15-exon isoform-1 (top) that encodes the 525- and 502-residue "p85" and "p70" S6K1 polypeptides through alternate translation start sites in exon 1; and a short, 10-exon isoform-2 (bottom) that incorporates three alternative cassette exons after exon 6 plus a longer 3' non-coding exon generated by alternative cleavage/polyadenylation within intron 7, and encodes a 316-residue protein (designated "p31" based on its apparent mobility, see **Fig. 5a**). Constitutive exons are shown as open boxes, and alternative exons or exon extensions are shown as black boxes. Introns are shown as horizontal lines, and splicing events are indicated by angled lines. **(b)** Alignment of S6K1 isoform-1 and isoform-2 protein sequences. The segments encoded by the 15 exons of isoform-1, and nine coding exons of isoform-2, are indicated by alternating black and blue lettering. Residues overlapping exon junctions are shown in red. The 12 conserved kinase subdomains present in isoform-1 are indicated by arrows and Roman numerals. Subdomains I-IV comprise the ATP-binding site. A catalytic aspartic acid (D218) in subdomain VIB is highlighted in magenta. An alternate translational start site (M24) that gives rise to p70-S6K1 is highlighted in green. T389 (T412 in p85), the main site of activation through phosphorylation by mTOR, is highlighted in cyan. The TOR signaling (TOS) motif is underlined.

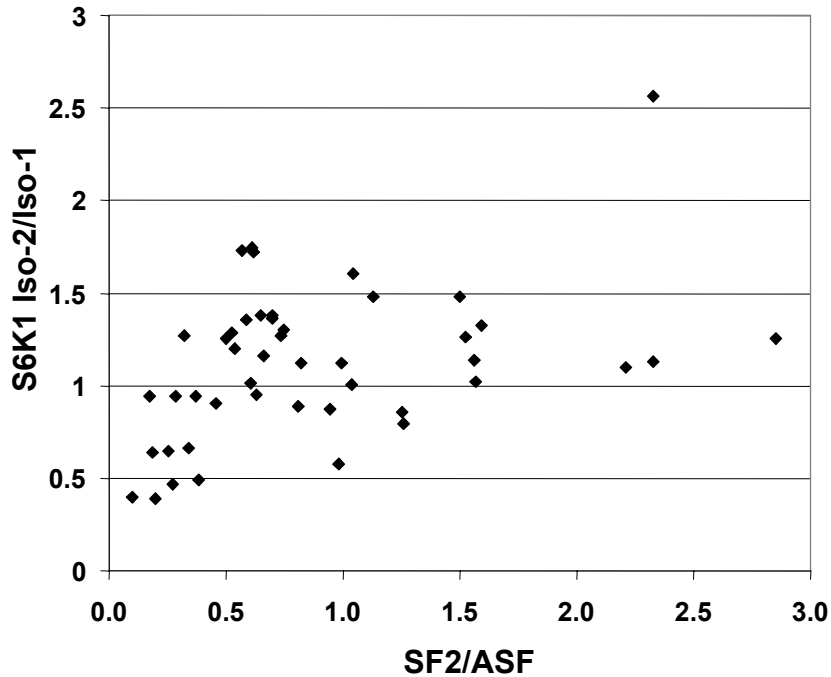

**Spearman  $r = 0.2978$**

**95% CI = 0.2364 to 0.3545**

**Supplementary Figure 4.** Correlation between SF2/ASF expression and S6K1 isoform ratios in 50 lung tumors. SF2/ASF and S6K1 isoform-1 and isoform-2 mRNA levels in 50 lung tumors were determined using RT-qPCR and an actin mRNA probe as a reference. The scatter plot shows the relationship between SF2/ASF mRNA levels and the ratio of S6K1 isoform-2/isoform-1 mRNA levels. The correlation coefficient  $r$  was calculated by non-parametric Spearman rank correlation, and a bootstrap technique was used to determine a 95% confidence interval (CI).

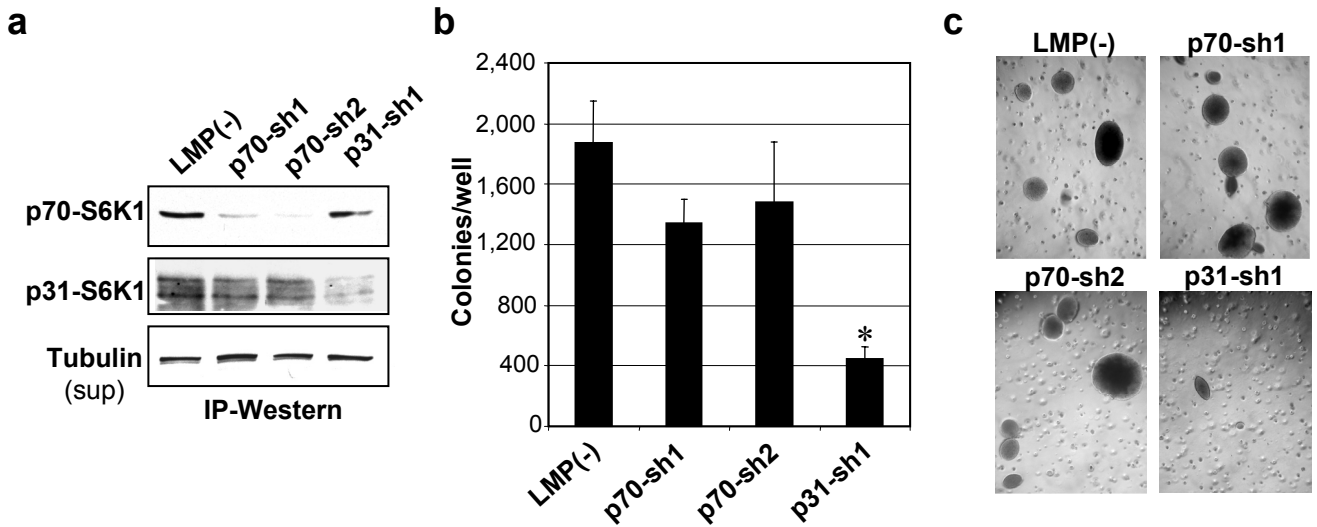

**Supplementary Figure 5.** Knockdown of isoform-2 of S6K1 reverses NCI-H460 cell transformation. **(a)** NCI-H460 cells were transduced with retroviruses encoding shRNAs against S6K1 isoform-1 (p70-sh1, p70-sh2) or isoform-2 (p31-sh1), or with the empty vector, LMP(-). S6K1 isoforms were immunoprecipitated from lysates using antibody against the N-terminus, and detected by Western blotting with the same antibody; IP-Western was used because of the low levels of p31-S6K1 in epithelial cells. **(b)** Cells described in **a** were seeded in soft agar and the colony number was measured 14 days later. Means  $\pm$  s.d. are shown; \*  $P = 6 \times 10^{-8}$ . **(c)** Representative fields from soft-agar plates with cells described in **b**.

**Supplementary Table 1:** Alternative splicing changes induced by overexpression (↑) or knockdown (↓) of specific splicing factors

| Gene <sup>1</sup>              | Isoforms | SF2/ASF ↑                                      | SF2/ASF ↓ <sup>2</sup>           | SRp55 ↑                               | SC35 ↑                                     | SRp30c ↑           | hnRNP A1 ↑                    |
|--------------------------------|----------|------------------------------------------------|----------------------------------|---------------------------------------|--------------------------------------------|--------------------|-------------------------------|
| <i>ADD1</i><br>exon 15         | 2        | Inclusion (h)                                  | Skipping                         | NE (h)                                | Inclusion (h)                              | NE (h)             | NE (h)                        |
| <i>BCL2L1</i><br>exon 2        | 2        | NE (h)                                         | NE                               | NE (h)                                | NE (h)                                     | NE (h)             | NE (h)                        |
| <i>BIN1</i><br>exon 10         | 1        | NE (m, h)                                      | ND                               | NE (m, h)                             | ND                                         | ND                 | ND                            |
| <i>BIN1</i><br>exon 12A        | 4        | Inclusion (m, r, h)                            | Skipping                         | NE (m, r, h)                          | Inclusion (weakly) (m, r, h)               | Skipping (m, r, h) | Skipping (m, r, h)            |
| <i>BRCA1</i><br>exons 9,10     | 3        | NE (h)                                         | Strong skipping                  | NE (h)                                | NE (h)                                     | NE (h)             | NE (h)                        |
| <i>CASP2</i><br>exon 9         | 2        | Inclusion (weak) (m, h)                        | ND                               | NE (m, h)                             | Inclusion (weak) (m, h)                    | NE (m, h)          | Inclusion (weak) (m, h)       |
| <i>CASP9</i><br>exons 3 - 6    | 2        | NE (m, h)                                      | NE                               | NE (m, h)                             | NE (h)                                     | NE (h)             | NE (h)                        |
| <i>CCNE1</i><br>exon7          | 2        | NE (m)                                         | ND                               | NE (m)                                | ND                                         | ND                 | ND                            |
| <i>CHEK2</i><br>exon 3         | 2        | NE (h)                                         | NE                               | NE (h)                                | NE (h)                                     | NE (h)             | NE (h)                        |
| <i>CHEK2</i><br>exon 6         | 2        | NE (h)                                         | NE                               | NE (h)                                | NE (h)                                     | NE (h)             | NE (h)                        |
| <i>HNRNPA2B1</i><br>exon 3     | 2        | Inclusion (h)                                  | Skipping                         | Inclusion (weak) (h)                  | NE (h)                                     | NE (h)             | NE (h)                        |
| <i>MGEA6</i><br>exon 19        | 2        | Skipping (h)                                   | Inclusion                        | NE (h)                                | Skipping (h)                               | NE (h)             | NE (h)                        |
| <i>MKNK1</i><br>exon 2         | 2        | NE (m)                                         | ND                               | NE (m)                                | NE (m)                                     | NE (m)             | NE (m)                        |
| <i>MKNK2</i><br>exon 13        | 2        | Inclusion (h)                                  | Skipping (h)                     | Inclusion (h)                         | NE (h)                                     | NE (h)             | NE (h)                        |
| <i>B-MYB</i><br>exon 8(9A)     | 2        | NE (h)                                         | Skipping                         | Skipping (h)                          | Skipping (h)                               | NE (h)             | Inclusion (h)                 |
| <i>C-MYB</i><br>exon 9A        | 2        | Inclusion (h)                                  | Inclusion                        | Skipping and increased expression (h) | Skipping and increased expression (h)      | NE (h)             | Increased expression (h)      |
| <i>S6K1</i><br>Iso-1 and Iso-2 | 2        | Increased Iso-2<br>Reduced Iso-1 (m, r, h)     | Increased Iso-1<br>Reduced Iso-2 | NE (m, r, h)                          | Increased Iso-2<br>Reduced Iso-1 (m, r, h) | NE (m, r, h)       | NE (m, r, h)                  |
| <i>TEAD1</i><br>exon 5         | 2        | Inclusion (m, h)                               | Skipping                         | NE (m, h)                             | Inclusion (m, h)                           | NE (m, h)          | Skipping (m, h)               |
| <i>TFDP2</i><br>exon6          | 3        | Inclusion (weak) (m)                           | ND                               | NE (m)                                | ND                                         | ND                 | ND                            |
| <i>TP73</i><br>exon 2          | 2        | NE (h)                                         | ND                               | Skipping (h)                          | ND                                         | ND                 | ND                            |
| <i>TSC2</i><br>exon 3          | 2        | Inclusion (m)<br>Increase of both isoforms (h) | NE                               | Increase of both isoforms (h)         | Increase of both isoforms (h)              | ND                 | Increase of both isoforms (h) |
| <i>TSC2</i><br>exon 25         | 2        | NE (h)                                         | NE                               | NE (h)                                | NE (h)                                     | NE (h)             | NE (h)                        |
| <i>VHL</i><br>exon 2           | 2        | NE (h)                                         | NE                               | NE (h)                                | NE (h)                                     | NE (h)             | NE (h)                        |

<sup>1</sup> Grey shading indicates genes that showed changes in alternative splicing

<sup>2</sup> RNA interference done in HeLa cells only

NE: No effect; ND: Not determined

h: human (IMR90 cells); m: mouse (MEF cells); r: rat (Rat1 cells)

For the following additional genes, only a single isoform was detected in the stable mouse and human cell lines: *CASP8* (exon 9), *FAS* (exon 6), *CD44* (exon v5), *FRAP1* (mTOR)(intron 32), *HER-2* (intron 8), *HER-2* (exon 16), *MAX* (exons 1-5), and *HIF1A* (exon 11).

## Supplementary Table 2: Primers, probes, and shRNA templates

### Q-PCR probes

| Probe | Location                        |
|-------|---------------------------------|
| S1F   | exon 1 of SF2/ASF               |
| S2F   | exon 4 of SF2/ASF               |
| RA1   | 3' UTR of hnRNPA1               |
| RA2   | exon 4 of hnRNPA1               |
| RA3   | exon 6 of SRp55                 |
| RA4   | exon 6 of SRp55 (within 3' UTR) |
| S6KA  | exon 6c of S6K1 isoform-2       |
| S6KB  | exon 15 of S6K1 isoform-1       |

S1F QF: CTTGGTGGGAAGGCCTGTT  
S1F QR: AGATGCGGCAATCGTTGTTC  
S1F QP: (6-FAM)-CGAGTCCGCGCTTTTCGTCACC-(TAMRA)  
S2F QF: CAGATCAATAATGGAGGCAATGG  
S2F QR: AATCATTTTTAACCCCTGCCTTT  
S2F QP: (6-FAM)-CAATACTGCCAATTCATCTGTGACA-(TAMRA)  
RA1 QF: GGAAAGTGTAAGCATTCCAACAA  
RA1 QR: TCAGCGTCACGATCAGACTGT  
RA1 QP: (6-FAM)-TTTTGCACCCCATGCTGTTGATTGCTAA-(TAMRA)  
RA2 QF: AGAACATCACCTAAGAGATTATTTGAACA  
RA2 QR: CAAAGGCAAAGCCCCTTTTC  
RA2 QP: (6-FAM)-TGCCACTGCCTCGGTCAGTCATG-(TAMRA)  
RA3 QF: CGATCCCCTAAAGAAAATGGAA  
RA3 QR: GGCCTTTGAGGGTGGAAACA  
RA3 QP: (6-FAM)-ATCAAGGAGCCAGTCCCGTTCCAATT-(TAMRA)  
RA4 QF: ATGAACATGCCGTAGTGCCTTT  
RA4 QR: GGTGAACAAATCGGGAGGAA  
RA4 QP: (6-FAM)-TGGCCAGTTTGTGCTCCTGCCTACTTTGA-(TAMRA)  
S6A QF: CTGTGAAACTGCCTCAGTCCTCTA  
S6A QR: AAAGCACAAGGCACTGCAATACT  
S6A QP: CACCCTCTCCATCCTGGAGTAATCTGCA  
S6B QF: GAGCAGATGGATGTGACAATGAG  
S6B QR: GAGATCATGGGAAAAGCTTGTTTT  
S6B QP: ATACGACAGCCGAACTCTGGGCCAT  
 $\beta$ -actin forward primer: GCAAAGACCTGTACGCCAACA;  
 $\beta$ -actin reverse primer: TGCATCCTGTTCGGCAATG  
 $\beta$ -actin probe: (6-FAM)-TGGCGGCACCACCATGTACC-(TAMRA)

### RT-PCR primers

#### 1. Human and mouse *CASP2* (exon 9)

Human: 5'hICH-1(exon 8): AACTGCCCAAGCCTACAGAA  
3'hICH-1 (exon 10): GCGTGGTTCTTTCCATCTTGTTGGTCA  
Mouse: 5'mICH-1 (exon 8): ATGCTAACTGTCCAAGTCTACAGAAC



- 3'mICH-1 (exon 10): GTCTCATCTTCATCAACTCCTCTTTGCC
2. Human *FAS* (exon 6)
    - FasS1: ATGCTGTGGATCTGGGCTGTC
    - FASAS: TGT CTT CAG CAA TTC TCG GGA TG
  3. Human *TP73* (exon2)
    - p73(exon2)For: GGACGGACGCCGATGCC
    - p73(exon2)Rev: GGTCCATGGTGCTGCTCAGC
  4. Mouse *TFDP2* (exon 6)
    - DP2-e2-For: GCTGAAGAGAGAGCCC
    - DP2-e8-Rev: ATCATAAACTCTTCGTCTAATG
  5. Mouse *BINI* (exon 10)
    - m*BINI* mid-For: AAGCCCAGAAGGTGTTTCGAG
    - m*BINI* mid-Rev: TGGCTGAGATGGGGACTT
  6. Mouse *BINI* (exon 11-15)
    - m*BINI* CT-For: CTGAGATCAGAGTGAACCATG
    - m*BINI* CT-Rev: CACCCGCTCTGTAAAATTC
  7. Mouse and human *BINI* exon 11-14
    - m/*HBINI*e11-For: CCTCCAGATGGCTCCCCTGC
    - m/*HBINI*e14-Rev: CCCGGGGGCAGGTCCAAGCG
  8. Mouse, human, and rat *RPS6KB*
    - S6K-P1-For: GAGGAGAACTATTTATGCAGTTAG
    - S6K-P2-Rev: GGGGCACTTCATCCCTAAGG
    - S6K-P4-Rev: GAACGCCGAGATGTTGCTAGG
  9. Mouse *MKNK1* (exon 1-5)
    - MNK1-e1-For: AGGTGGGGGTGCTCGCGGCCG
    - MNK1-e5-Rev: CCACGATGGGAAGGGGCTCAC
  10. Human *MKNK2* (exon 13a and 13b)
    - MKNK2 e11 for: CCAAGTCCTGCAGCACCCCTG
    - MKNK2 e13a rev: GATGGGAGGGTCAGGCGTGGTC
    - MKNK2 e13b rev: GAGGAGGAAGTGA CTGTCCCAC
  11. Mouse and human *TEAD1* (exon 4-8)
    - TEF-1*-e3,4-For: AGACGAAGGCAAATGTATGG
    - TEF-1*-e9,8-Rev: CGTAGGCTCAAACCCTGGAAT
  12. Human *BRCA1* (exon 10)
    - hBRCA1ex9-For: TAATAAGGCAACTTATTGCAG
    - hBRCA1ex11-RevS: CTTCTCAGTGGTGTTC AAATC
  13. Human *CCNE1* (exon 7)
    - hCyclinE-For: ATCATGCCGAGGGAGCGCCAGGGA
    - hCyclinE-ET-Rev: CCAGGACACAGAGATCCAACAGCTTC
  14. Human *CASP8* (exon 9)
    - Caspase-8-For: TCTGTGCCCAAATCAACAAG
    - Caspase-8-Rev: GCCACCAGCTAAAAACATTCC
  15. Human *CASP9* (exons 3-6)
    - Caspase 9-For: GCTCTTCCTTTGTTTCATCTCC
    - Caspase 9-Rev: CATCTGGCTCGGGGTTACTGC
  16. Human and mouse *TSC2* (exon 3)
    - h/mTSC2 e2-For: GGCCTCAACAATCGCATCCG
    - h/mTSC2 e4-Rev: CCAACATCCATCCACTGCAGG
  17. Human *TSC2* (exon 25)

|                                            |                           |
|--------------------------------------------|---------------------------|
| hTSC2 e24-For:                             | GGCCTGCGGTCCAATGTCCTC     |
| hTSC2 e26-Rev:                             | CTCTTCGGGACAGCCGTGAAG     |
| <b>18. Human <i>C-MYB</i> (exon 9A)</b>    |                           |
| c-Myb e8-For:                              | CCACACATGCAGCTACCCCCG     |
| c-Myb e10-Rev:                             | CACAGTCTGGTCTCTATGAAATGG  |
| <b>19. Human <i>B-MYB</i> (exon 9A)</b>    |                           |
| B-myb e7-For:                              | GGAAGTCTTCTGACCAACTGGC    |
| B-myb e9-Rev:                              | GCAGCATGTTTCTGGTGCAGGGG   |
| <b>20. Human <i>HNRNPA2B1</i> (exon 2)</b> |                           |
| HnRNPA2B1 e1-For:                          | GCGGCAGTAGCAGCAGCGCC      |
| HnRNPA2B1 e3-Rev:                          | CTTACGGAACTGTTCCTTTTCTC   |
| <b>21. Human <i>MGEA6</i> (exon 19)</b>    |                           |
| MGEA6 e-18-For:                            | CTGAAACAGAGCTTAAATTTGAAC  |
| MGEA6 e-20-Rev:                            | CTGGCGGAGGAAACATCATCC     |
| <b>22. Human <i>VHL</i> (exon 2)</b>       |                           |
| VHL e-1-For:                               | AACTTCGACGGCGAGCCGCGAG    |
| VHL e-3-Rev:                               | CTGTGTCAGCCGCTCCAGGTC     |
| <b>23. Human <i>BCL2L1</i> (exon 2)</b>    |                           |
| Bcl-Xfor:                                  | GAGGCAGGCGACGAGTTTGAA     |
| Bcl-Xrev:                                  | TGGTAGGTGAGATGGGAGGGT     |
| <b>24. Human <i>FRAP1</i> (intron 32)</b>  |                           |
| FRAP1-e32-For:                             | ACTGCATCAGGACCTCTTCTCC    |
| FRAP1-e34-Rev:                             | GGTCTAGACCACCCTCTCTCTGACG |
| <b>25. Human <i>HER2</i> (intron 8)</b>    |                           |
| HER2-E8-For:                               | CAACTACCTTTCTACGGACGTG    |
| HER2-in8-Rev:                              | GGAGGTGGGGGTGGGTGGGG      |
| HER2-E9-Rev:                               | AGCTCTCCGGCAGAAATGCCAGG   |
| <b>26. Human <i>HER2</i> (exons 15-17)</b> |                           |
| HER2-E15-For:                              | CTGCGTGGCCCCGCTGCCCCAG    |
| HER2-E17-Rev:                              | GTTTCCTGCAGCAGTCTCCGC     |
| <b>27. Mouse <i>MAX</i> (exons 1-5)</b>    |                           |
| dMAX-For:                                  | ATGAGCGATAACGATGACATC     |
| dMAX-Rev:                                  | GCCCCGCATGGTTAGC          |
| <b>28. <i>CD44</i> (exon v5)</b>           |                           |
| CD44-For:                                  | CTATTGTCAACCGTGATGGTAC    |
| CD44-Rev:                                  | GCCAGGAGAGATGCCAAGATG     |
| <b>29. <i>HIF1A</i> (exon )11</b>          |                           |
| hHIF-1a-e10-For:                           | CCCCAGATTCAGGATCAGACA     |
| hHIF-1a-e13-Rev:                           | CCATCATGTTCCATTTTTCGC     |

**Cloning primers for *RPS6KB1*:**

T7s6k For: GGGGAAAGATCTACCAGCCACCATGGCATCGATG  
ACAGGTGGCCAACAGATGGGTATGAGGCGACGAAGGAGGCGGGAC  
T7s6k Rev-1: GGGGAAGAATTCACTATGTAATGACATTGACTCTCTG  
T7s6k Rev-2: GGGGAAGAATTCAAGGGCTGAATCAACCCTGTCTGG

**SF2/ASF shRNA templates:**

SF2-sh\*:

TGCTGTTGACAGTGAGCGAGGGCATCTACGTGGGTAACCTT TAGTGAAGCCAC  
AGATGTAAAGTTACCCACGTAGATGCGGCTGCCTACTGCCTCGGA

SF2-sh1:

TGCTGTTGACAGTGAGCGCTGGCAGTATTGACCTTATACTTAGTGAAGCCACA  
GATGTAAAGTATAAGGTCAATACTGCCAATGCCTACTGCCTCGGA

SF2-sh2:

TGCTGTTGACAGTGAGCGCGGGCTAAAGTGTTGAATTGCATAGTGAAGCCAC  
AGATGTATGCAATTCAACACTTAGCCCATGCCTACTGCCTCGGA

**S6K shRNA templates:**

S6K1 p70-sh1:

TGCTGTTGACAGTGAGCGCGGCATGGAACATTGTGAGAAATAGTGAAGCCAC  
AGATGTATTTCTCACAATGTTCCATGCCATGCCTACTGCCTCGGA

S6K1 p70-sh2:

TGCTGTTGACAGTGAGCGCTGGAACATTGTGAGAAATTTGTAGTGAAGCCAC  
AGATGTACAAATTTCTCACAATGTTCCATTGCCTACTGCCTCGGA

S6K1 p31-sh1:

TGCTGTTGACAGTGAGCGACCGGAGAACATCATGCTTAATTAGTGAAGCCAC  
AGATGTAAATTAAGCATGATGTTCTCCGGCTGCCTACTGCCTCGGA
